# Supplementary material
Source: Copernicus journal article supplement (doi:10.5194/mr-2026-6)

# 100 $\mu\text{M}$ EPR Spectra — Peak-to-Peak Normalised

Peak-to-peak normalised (SOFFA field-aligned)

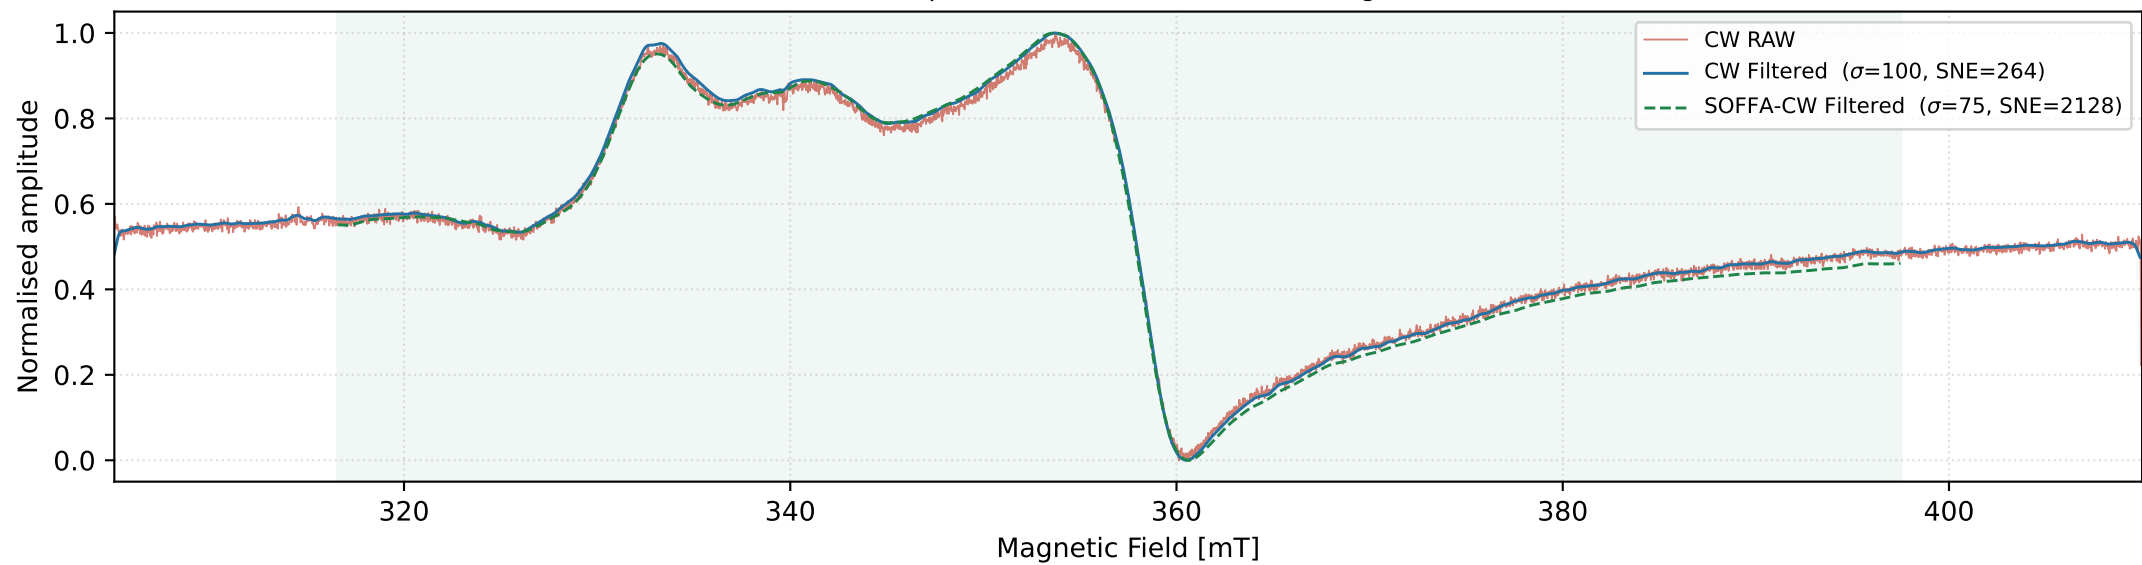

Residual (CW Filtered – SOFFA aligned)

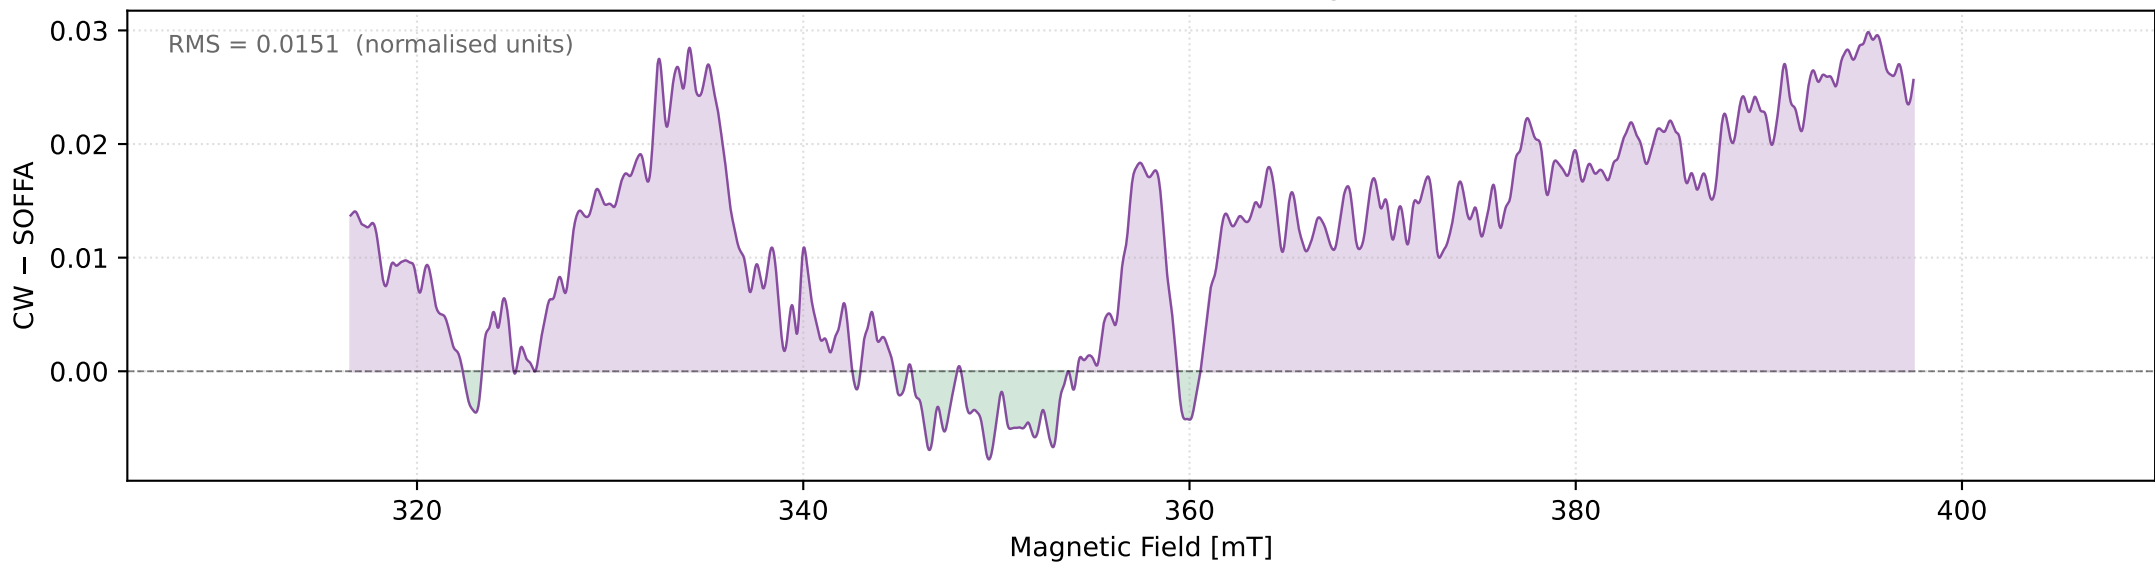

FFT zoomed 0 – 0.05 (log scale, each curve normalised — filter rolloff region)

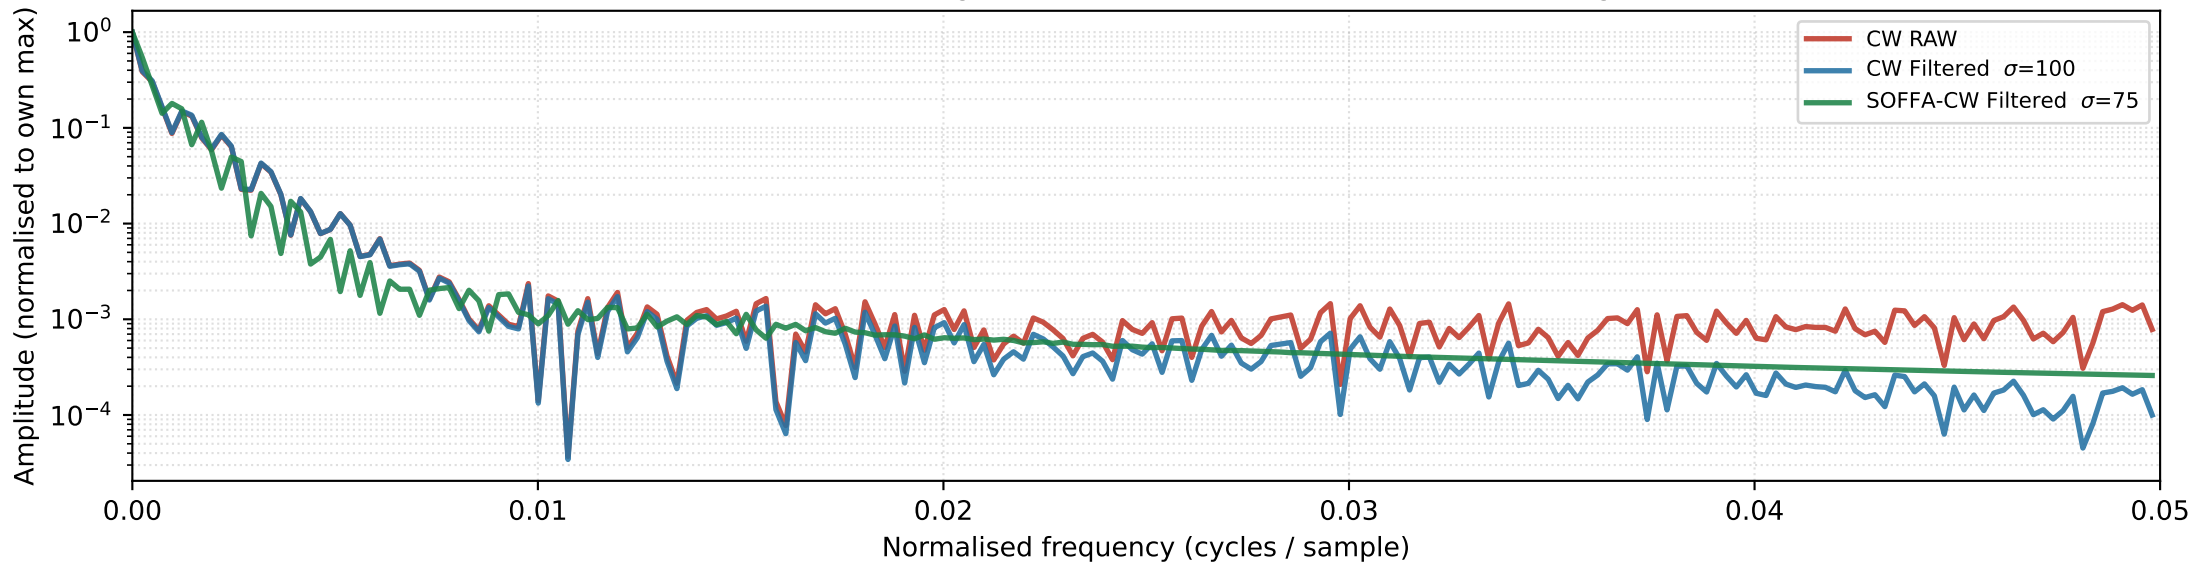

Supplement: Supplementary file [file mr-2026-6-AC3-supplement.pdf]
